# Supplementary material
Source: PubMed Central journal article supplement (PMC7783589)
Supplement: jama-e2024096-s001.pdf [file jama-e2024096-s001.pdf]

## Supplemental Online Content

White K, Kumar B, Goyal V, Wallace R, Roberts SCM, Grossman D. *JAMA*. Changes in abortion in Texas following an executive order ban during the coronavirus pandemic.  
doi:10.1001/jama.2020.24096

### **eMethods.**

This supplemental material has been provided by the authors to give readers additional information about their work.

**eMethods.**

In Arkansas, all abortion facilities provided data on Texas residents obtaining abortions for both 2017 and 2020. In Colorado, 9 facilities provided data in 2017 and 14 provided data in 2020. In Kansas, data were not collected directly from facilities on Texas residents obtaining abortions in 2017. According to Kansas vital statistics reports, 22 Texas residents obtained an abortion in Kansas in calendar year 2017. See [https://www.kdheks.gov/phi/abortion\\_sum/2017\\_Preliminary\\_Abortion\\_Report.pdf](https://www.kdheks.gov/phi/abortion_sum/2017_Preliminary_Abortion_Report.pdf). All Kansas facilities provided data in 2020. In Louisiana and Oklahoma, data on Texas residents obtaining abortions in 2017 were obtained from state health departments. In 2020, 2 of 3 open facilities in Oklahoma and all facilities in Louisiana provided data on Texas residents. In New Mexico, 3 facilities provided data in 2017 and 4 provided data in 2020.
